# Supplementary material
Source: publisher figshare collection journal article supplement (https://acs.figshare.com/ndownloader/files/11658593)
Supplement: Supplementary file 1 [file 11658593]

---

Supporting information

**Zein increases the cytoaffinity and biodegradability of scaffolds**

**3D-printed with zein and poly( $\epsilon$ -caprolactone) composite ink**

Linzhi Jing,<sup>a,c</sup> Xiang Wang,<sup>a</sup> Hang Liu,<sup>b</sup> Yuyun Lu,<sup>c</sup> Jinsong Bian<sup>a,d</sup>, Jie Sun<sup>\*,b</sup> and Dejian Huang<sup>\*,a,c</sup>

a) National University of Singapore (Suzhou) Research Institute, 377 Linquan Street, Suzhou, Jiangsu 215123, China

b) Department of Industrial Design, Xi'an Jiaotong-Liverpool University, 111 Ren'ai Road, Suzhou, Jiangsu 215123, China

c) Food Science and Technology Programme, c/o Department of Chemistry, National University of Singapore, 3 Science Drive 3, Singapore 117543

d) Department of Pharmacology, Yong Loo Lin School of Medicine, National University of Singapore Blk MD3, 16 Medical Drive Level 4, 04-01, Singapore 117600

\* To whom correspondence should be made. Jie Sun, email: [Jie.Sun@xjtlu.edu.cn](mailto:Jie.Sun@xjtlu.edu.cn) .

Dejian Huang, email: [chmhdj@nus.edu.sg](mailto:chmhdj@nus.edu.sg).

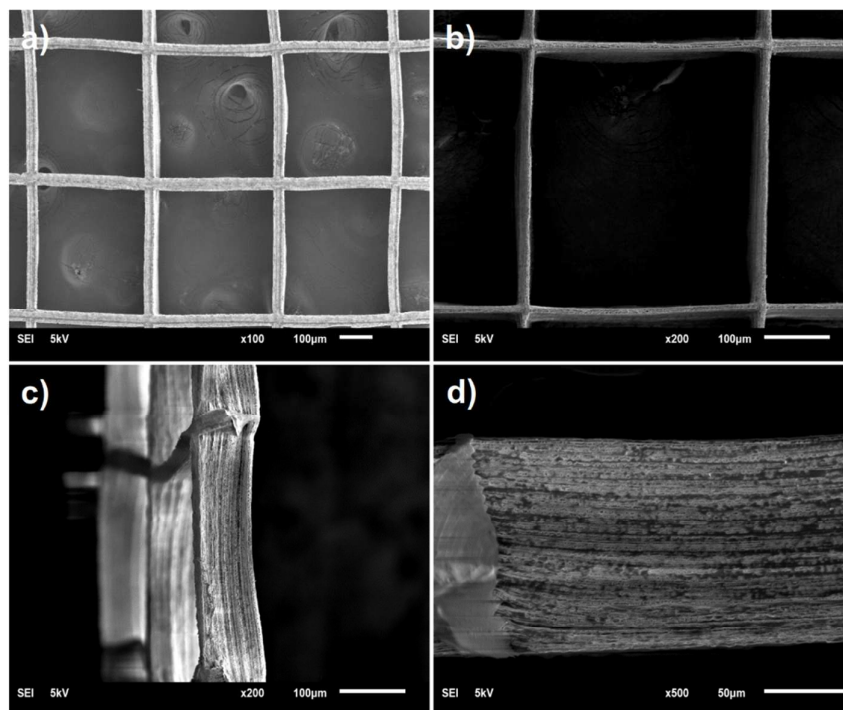

**Figure S1.** SEM images of PCL/zein-20 scaffolds after 12 days enzyme-accelerated degradation (PBS, with 0.1 mg/mL proteinase k and 1% antibiotics at 37 °C). a) Back view, b) Top view, c) and d) Cross-sectional view.

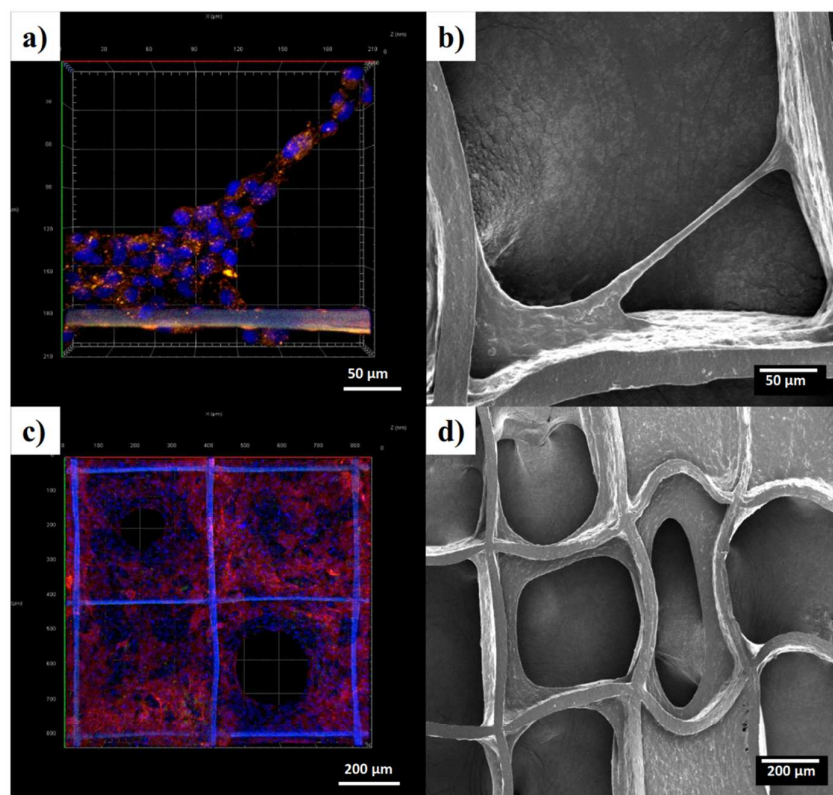

**Figure S2.** CLSM and SEM images of NIH/3T3 cell attached on PCL/zein-20 scaffold, a) and b) 2 days culture; c) and d) 7 days culture.

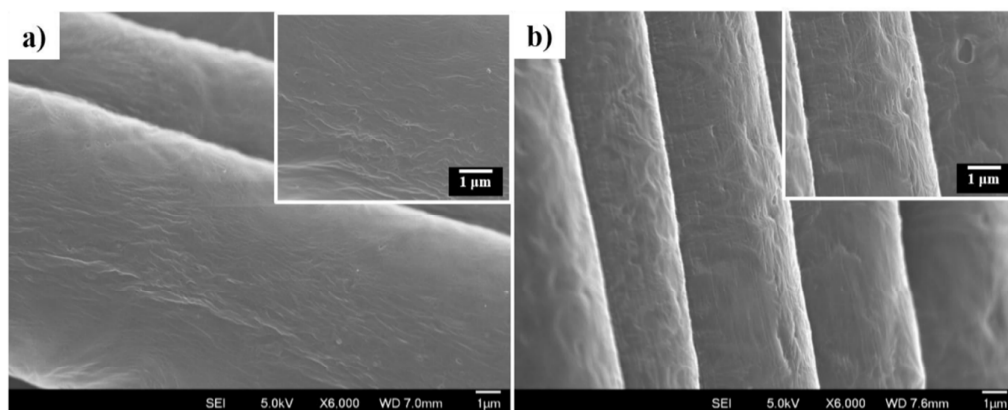

**Figure S3.** SEM images of fiber surface morphology after 14 day cultures of H1299 cell line. a) PCL scaffold and b) PCL/zein-20 scaffold.

---

**Table S1.** Summary of original data of enzyme accelerated degradation of PCL and PCL/zein scaffolds in PBS (10 mM, pH 7.4) at 37 oC, 5.0% CO<sub>2</sub> with addition of 0.1 mg/mL proteinase k and 1% antibiotics.

|               | PCL  |      | PCL/zein-10 |      | PCL/zein-20 |      |
|---------------|------|------|-------------|------|-------------|------|
|               | Mean | SD   | Mean        | SD   | Mean        | SD   |
| <b>Day 0</b>  | 0.0% | 0.0% | 0.0%        | 0.0% | 0.0%        | 0.0% |
| <b>Day 2</b>  | 1.1% | 0.2% | 14.8%       | 1.7% | 23.9%       | 1.1% |
| <b>Day 4</b>  | 1.3% | 0.2% | 24.5%       | 2.1% | 32.0%       | 0.4% |
| <b>Day 6</b>  | 1.5% | 0.2% | 32.6%       | 0.7% | 41.3%       | 1.3% |
| <b>Day 8</b>  | 1.6% | 0.2% | 39.1%       | 0.9% | 45.6%       | 1.2% |
| <b>Day 10</b> | 1.6% | 0.1% | 46.2%       | 1.5% | 50.9%       | 1.7% |
| <b>Day 12</b> | 1.7% | 0.1% | 50.0%       | 1.3% | 54.2%       | 1.6% |
